# Supplementary material for: Tick bite-induced alpha-gal syndrome and immunologic responses in an alpha-gal deficient murine model
Source: Front Immunol. 2024 Feb 8;14:1336883. doi: 10.3389/fimmu.2023.1336883 (PMC10882631; doi:10.3389/fimmu.2023.1336883)
Supplement: Supplementary file 1 [file Table_1.xlsx]

## Sheet: Sheet1
Table S1. Differentially expressed genes in biopsy site at tick Amblyomma americanum attachment. The values displayed are changes in gene expression above or below 1.5 fold with adjuted P-values greater than 0.05 in comparison to control infestation
Gene Symbols	Description	First Infestation	Second Infestation	Third Infestation
Ackr1	atypical chemokine receptor 1 (Duffy blood group)	-4.45001
Ackr3	atypical chemokine receptor 3	-2.54109
Ackr4	atypical chemokine receptor 4	-4.28012		-3.98851
Acsl3	acyl-CoA synthetase long-chain family member 3		-3.03497
Acsl4	acyl-CoA synthetase long-chain family member 4		-1.80756
Adar	adenosine deaminase, RNA-specific	2.10698
Adgrg3	adhesion G protein-coupled receptor G3	2.91667	2.95919	2.85484
Ahr	aryl-hydrocarbon receptor	-1.84815
Akt3	thymoma viral proto-oncogene 3	-2.06733
Aif1	allograft inflammatory factor 1			10.6843
Alox12	arachidonate 12-lipoxygenase			-5.82021
Alox15	arachidonate 15-lipoxygenase		3.70114	6.42858
Alox5ap	arachidonate 5-lipoxygenase activating protein			3.05533
Alpl	alkaline phosphatase, liver/bone/kidney	2.84615
Amica1	adhesion molecule, interacts with CXADR antigen 1		2.14731	2.88198
Apbb1ip	amyloid beta (A4) precursor protein-binding, family B member 1 Interacting Protein	2.10935		2.58673
Apol6	apolipoprotein L 6		-6.99998
App	amyloid beta (A4) precursor protein		-1.71158	-2.06713
Arrb2	arrestin, beta 2			2.95046
Atf4	activating transcription factor 4			2.21
Atp6v1b2	ATPase, H+ transporting, lysosomal V1 subunit B2			2.03475
Atg12	autophagy related 12	-1.83273
Atg13	autophagy related 13	-1.72672		-1.65
Atg3	autophagy related 3	-2.15127
Atf4	activating transcription factor 4		2.15439	2.2065
Bach2	BTB and CNC homology 2	-1.98214	-1.66026
Batf	basic leucine zipper transcription factor, ATF-like	6.17282	4.77778	14.7609
Bax	BCL2-associated X protein	1.66955		1.55675
Bcl3	B cell leukemia/lymphoma 3	4.75113	5.99164	9.52745
Bdkrb1	bradykinin receptor, beta 1		2.89287
Bnip3	BCL2/adenovirus E1B interacting protein 3	-3.15312
Bpi	bactericidal permeablility increasing protein		2.5873
Bst2	bone marrow stromal cell antigen 2			2.99999
C1qbp	complement component 1, q subcomponent binding protein		-1.85368
C2	complement component 2 (within H-2S)	-1.85529		-1.96198
C3	complement component 3			3.08598
C3ar1	complement component 3a receptor 1			6.65814
C5ar1	complement component 5a receptor 1			6.2056
Casp4	caspase 4, apoptosis-related cysteine peptidase			4.34965
Casp8	caspase 8	1.97143
Cbfb	core binding factor beta	-1.61988
Cbl	Casitas B-lineage lymphoma		2.04591	2.35612
Ccl12	chemokine (C-C motif) ligand 12			14.132
Ccl2	chemokine (C-C motif) ligand 2			26.964
Ccl24	chemokine (C-C motif) ligand 24	-15.5625		30.2585
Ccl3	chemokine (C-C motif) ligand 3	34.5231	25.2307	6.66669
Ccl4	chemokine (C-C motif) ligand 4	21.1039	6.67048
Ccl6	chemokine (C-C motif) ligand 6			22.0377
Ccl7	chemokine (C-C motif) ligand 7			17.8885
Ccl8	chemokine (C-C motif) ligand 8		6.5101	25.053
Ccl9	chemokine (C-C motif) ligand 9			8.80059
Ccr1	chemokine (C-C motif) receptor 1	16.8106		65.3181
Ccr1l1	chemokine (C-C motif) receptor 1-like 1		2.4923
Ccr2	chemokine (C-C motif) receptor 2			4.06558
Ccr4	chemokine (C-C motif) receptor 4			-2.13286
Ccr5	chemokine (C-C motif) receptor 5			14.9055
Cd14	CD14 antigen	19.859	6.97044	5.82012
Cd163	CD163 antigen		8.15412	13.032
Cd2	CD2 antigen		2.92833	2.75
Cd22	CD22 antigen		2.62766
Cd209e	CD209e antigen	-6.99998		14.4827
Cd244a	CD244 antigen			3.55895
Cd247	CD247 antigen	-2.66071		-2.27693
Cd274	CD274 antigen	3.32494		3.80456
Cd276	CD276 antigen		1.87535
Cd28	CD28 antigen		1.93925
Cd3d	CD3 antigen, delta polypeptide	-2.99343
Cd3e	CD3 antigen, epsilon polypeptide	-8.47369		-3.74192
Cd3g	CD3 antigen, gamma polypeptide	-9.31819		-2.75229
Cd36	CD36 antigen		-8.95355
CD38	CD38 antigen			15.6
Cd4	CD4 antigen		3.56344
CD40	CD40 antigen			2.85294
Cd40lg	CD40 ligand		2.63333
Cd44	CD44 antigen	2.42353		3.01473
Cd59a	CD59a antigen	-6.40625	-4.0909	-3.97298
Cd68	CD68 antigen			2.88912
Cd6	CD6 antigen		3.71427
Cd80	CD80 antigen	5.20439	4.70929	6.84376
Cd84	CD84 antigen			5.4536
Cd96	CD96 antigen	-6.23332
Cdk4	cyclin-dependent kinase 4	1.79718
Cebpb	CCAAT/enhancer binding protein (C/EBP), beta	3.05		1.9194
Cfd	complement factor D (adipsin)		-9.28898
Clec7a	C-type lectin domain family 7, member a		5.8923	13.7675
Crebbp	CREB binding protein	-1.5925		1.9194
Crk	v-crk sarcoma virus CT10 oncogene homolog (avian)		2.34917	2.21454
Csf1r	colony stimulating factor 1 receptor			2.12308
Csf2ra	colony stimulating factor 2 receptor, alpha	4.43425	3.41099	5.72367
Csf2rb	colony stimulating factor 2 receptor, beta	3.60043		6.74075
Csf3r	colony stimulating factor 3 receptor (granulocyte)	18.75	7.39131	32.5853
Ctsl	cathepsin L			2.45074
Ctss	cathepsin S			3.62362
Ctsw	cathepsin W	-2.37682		-2.35106
Ctsz	cathepsin Z			3.88208
Cul1	cullin 1	-1.66133	-1.56671
Cxcl1	chemokine (C-X-C motif) ligand 1	12.1835	9.92062	17.1535
Cxcl10	chemokine (C-X-C motif) ligand 10	6.46666
Cxcl14	chemokine (C-X-C motif) ligand 14	5.36252	3.56831	6.42796
Cxcl16	chemokine (C-X-C motif) ligand 16			2.13825
Cxcl3	chemokine (C-X-C motif) ligand 3	64.212	15.0294	23.0641
Cxcl5	chemokine (C-X-C motif) ligand 5		33.9011	203.174
Cxcr2	chemokine (C-X-C motif) receptor 2	9.92956	9.13415	11.9722
Cxcr4	chemokine (C-X-C motif) receptor 4	4.07777	4.03705	4.62678
Cxcr6	chemokine (C-X-C motif) receptor 6	-4.69567
Cyp2e1	cytochrome P450, family 2, subfamily e, polypeptide 1
Cystm1	cysteine-rich transmembrane module containing 1		-3.01482
Defb14	defensin beta 14			2.83015
Ddit3	DNA-damage inducible transcript 3		-1.87451
Ddost	dolichyl-di-phosphooligosaccharide-protein glycotransferase	1.58689
Dhx58	DEXH (Asp-Glu-X-His) box polypeptide 58			6.02972
Dtx3l	deltex 3-like (Drosophila)			2.70883
Diablo	diablo homolog (Drosophila)		-2.15968
Dnaja2	DnaJ (Hsp40) homolog, subfamily A, member 2	-2.06801
Dysf	dysferlin			2.65255
Eif2ak3	eukaryotic translation initiation factor 2 alpha kinase		1.98314
Eif3f	eukaryotic translation initiation factor 3, subunit F	-1.6683		1.61473
Entpd1	ectonucleoside triphosphate diphosphohydrolase 1	3.14801
Ephx2	epoxide hydrolase 2, cytoplasmic		-15.7
Ern1	endoplasmic reticulum (ER) to nucleus signalling 1	-1.54487
Evl	Ena-vasodilator stimulated phosphoprotein		2.41538	2.80424
Fas	Fas (TNF receptor superfamily member 6)			2.26348
Fcgr1	Fc receptor, IgG, high affinity I			37.4595
Fcer1a	Fc receptor, IgE, high affinity I, alpha polypeptide		6.72726
Fcgr2b	Fc receptor, IgG, low affinity IIb		9.47956	13.7112
Fcgr4	Fc receptor, IgG, low affinity IV			18.64
Fcgrt	Fc receptor, IgG, alpha chain transporter			2.21531
Fgr	Gardner-Rasheed feline sarcoma viral (Fgr) oncogene			27.238
Foxo1	forkhead box O1	-2.17214	-1.70686	-1.70386
Fpr1	formyl peptide receptor 1	9.60416	4.0354	4.06
Fpr2	formyl peptide receptor 2	16.9538		44.7272
Fos	FBJ osteosarcoma oncogene		11.9464
Gab2	growth factor receptor bound protein 2-associated protein 2	-1.88298
Gadd45b	growth arrest and DNA-damage-inducible 45 beta	2.33333
Gbp2	guanylate binding protein 2			3.13401
Gbp5	guanylate binding protein 5			2.92921
Gk	glycerol kinase	2.68555		2.37721
Gla	galactosidase, alpha			2.84782
Glb1	galactosidase, beta 1			2.0164
Gstm4	glutathione S-transferase, mu 4	-2.0708
Gucy1a3	guanylate cyclase 1, soluble, alpha 3	-2.45757		-2.51336
Gucy1b3	guanylate cyclase 1, soluble, beta 3		-2.34042	-2.71901
H2-Ab1	histocompatibility 2, class II antigen A, beta 1	-1.90061
H2-D1	histocompatibility 2, D region locus 1		2.09207	2.80175
H2-DMa	histocompatibility 2, class II, locus DMa	-3.5796
H2-DMb2	histocompatibility 2, class II, locus Mb2	-3.3077
H2-Eb1	histocompatibility 2, class II antigen E beta		1.7473
H2-K1	histocompatibility 2, K1, K region	2.23485		1.71411
H2-M3	histocompatibility 2, M region locus 3			2.93278
H2-Q10	histocompatibility 2, Q region locus 10	8.70238		4.57896
H2-T23	histocompatibility 2, T region locus 23	1.95437		1.6442
Havcr2	hepatitis A virus cellular receptor 2		3.86956	6.38891
Hck	hemopoietic cell kinase	5.36289		7.6821
Hcst	hematopoietic cell signal transducer		2.87593
Hdc	histidine decarboxylase	19.6568	12.8227	13.6445
Hk3	hexokinase 3	5.54839	4.79091	16.2868
Hlx	H2.0-like homeobox		2.55145	3.65677
Hmox1	heme oxygenase 1		2.63269	4.7243
Hsp90ab1	heat shock protein 90 alpha, class B member 1		-2.39036
Hsp90b1	heat shock protein 90, beta (Grp94), member 1		1.86058	2.33728
Hspb1	heat shock protein 1		-2.73344	-2.54705
Icos	inducible T cell co-stimulator		4.36539	9.36364
Ifitm1	interferon induced transmembrane protein 1	17.6678	4.85779	10.8755
Ifitm2	interferon induced transmembrane protein 2	3.01722	2.06101	2.64431
Ifitm3	interferon induced transmembrane protein 3			2.82044
Ifnar1	interferon (alpha and beta) receptor 1	1.9589	2.72348	1.70448
Ifnz	interferon zeta		2.67959	2.33929
Igfbp7	insulin-like growth factor binding protein 7	2.04799
Ikbke	inhibitor of kappaB kinase epsilon	1.98433
Il10ra	interleukin 10 receptor, alpha		2.46465	2.1755
Il11ra1/2	interleukin-11 Receptor alpha chain	1.67959
Il12rb2	interleukin 12 receptor, beta 2			-2.90986
Il13ra2	interleukin 13 receptor, alpha 2			5.3261
Il15ra	interleukin 15 receptor, alpha chain	1.65753
Il17rb	interleukin 17 receptor B	-3.23811
Il17rc	interleukin 17 receptor C		1.94497	1.85563
Il17rd	interleukin 17 receptor D	-3.28333	-2.825
Il17d	interleukin 17D			-2.25532
Il18r1	interleukin 18 receptor 1	-2.11538
Il18rap	interleukin 18 receptor accessory protein	4.79593	3.82185	4.56081
Il19	interleukin 19		20.9391	210.501
Il1b	interleukin 1 beta	831.043		644.055
Il1f6	interleukin 1 family, member 6		3.10544
Il1f9	interleukin 1 family, member 9	2.73248	2.56159	2.13239
Il1f10	interleukin 1 family, member 10			-8.662
Il1rl1	interleukin 1 receptor-like 1		4.43173	6.00244
Il1r1	interleukin 1 receptor, type I			4.9121
Il20ra	interleukin 20 receptor, alpha	-2.96419
Il20rb	interleukin 20 receptor beta	-2.41642		-3.35797
Il21r	interleukin 21 receptor			6.99998
Il22ra1	interleukin 22 receptor, alpha 1			-3.81666
Il22ra2	interleukin 22 receptor, alpha 2	-4.77692		-2.8662
Il23r	interleukin 23 receptor	-2.07609
Il24	interleukin 24	23.625	8.80486	137.5
Il2ra	interleukin 2 receptor, alpha chain			3.92929
Il2rb	interleukin 2 receptor, beta chain	-3.40298
Il2rg	interleukin 2 receptor, gamma chain	3.51492		7.35584
Il33	interleukin 33			4.40896
Il34	interleukin 34	-2.56267		-3.12767
Il3ra	interleukin 3 receptor, alpha chain	2.42942	2.58082	1.98246
Il4ra	interleukin 4 receptor, alpha			19.4116
Il6	interleukin 6	14.6111	13.7642	121.615
Il6st	interleukin 6 signal transducer			2.13586
Il7	interleukin 7	-3.04
Il7r	interleukin 7 receptor		2.73566	3.01191
Isg15	ISG15 ubiquitin-like modifier			7.65032
Irak1	interleukin-1 receptor-associated kinase 1	-1.56267
Irf1	interferon regulatory factor 1			2.18568
Irf7	interferon regulatory factor 7			4.54837
Irf9	interferon regulatory factor 9		2.21284	3.13877
Isg15	ISG15 ubiquitin-like modifier			7.65032
Itgae	integrin alpha E, epithelial-associated	-2.91026
Itgam	integrin alpha M	4.08269		5.48199
Itgb2	integrin beta 2	3.15448		4.08374
Itpr3	inositol 1,4,5-triphosphate receptor 3			-2.67372
Itm2c	integral membrane protein 2C		1.57754
Jak1	Janus kinase 1	-2.10192
Jak2	Janus kinase 2			3.53642
Jak3	Janus kinase 3		3.29612	4.74435
Junb	jun B proto-oncogene		6.59161	2.98216
Kdm6b	KDM1 lysine (K)-specific demethylase 6B	2.49474	1.74426
Klrc1	killer cell lectin-like receptor subfamily C, member 1		1.76296
Kir3dl1/2	killer cell immunoglobulin-like receptor, three domains, long cytoplasmic tail, 1/2	-3.6889
Klrd1	killer cell lectin-like receptor, subfamily D, member 1	-2.5946
Klrk1	killer cell lectin-like receptor subfamily K, member 1	-4.94445
Lat	linker for activation of T cells		3.7125
Lcn2	lipocalin 2	10.5433		27.8999
Lcp1	lymphocyte cytosolic protein 1			4.05812
Lcp2	lymphocyte cytosolic protein 2	3.22388		4.24284
Ldhb	lactate dehydrogenase B		-1.89275	-2.19955
Lif	leukemia inhibitory factor		2.73494
Litaf	LPS-induced TN factor	1.79154	1.71877	1.90729
Lrg1	leucine-rich alpha-2-glycoprotein 1	5.10677		5.48606
Lyn	Yamaguchi sarcoma viral (v-yes-1) oncogene homolog	3.88825		3.67807
Ltbr	lymphotoxin B receptor		2.7353
Lyz2	lysozyme 2		2.50606	2.52662
Maf	avian musculoaponeurotic fibrosarcoma (v-maf) AS42 oncogene		3.16712	2.46219
Mafb	v-maf musculoaponeurotic fibrosarcoma oncogene homolog B		5.14414	4.10943
Map1lc3a	microtubule-associated protein 1 light chain 3 alpha	-1.82874		-1.87818
Map2k2	mitogen-activated protein kinase kinase 2	2.87637	2.18592
Map2k7	mitogen-activated protein kinase kinase 7	-1.53186
Map3k3	mitogen-activated protein kinase kinase kinase 3	1.53657
Mapk1	mitogen-activated protein kinase 1	-1.62664	-1.63128	-1.75595
Mapk9	mitogen-activated protein kinase 9	-1.83387
Mapkapk2	MAP kinase-activated protein kinase 2			2.09287
Marcks	myristoylated alanine rich protein kinase C substrate	5.15478	3.99933	3.97744
Mb21d1	Mab-21 domain containing 1			2.35821
Mcoln1	mucolipin 1		-5.72002
Mefv	Mediterranean fever	6.95678		10.5224
Mif	macrophage migration inhibitory factor	2.40053
Mlkl	mixed lineage kinase domain-like			4.59301
Mmp13	matrix metallopeptidase 13		32.4325	216.036
Mmp8	matrix metallopeptidase 8	8.72309	8.18073	51.206
Mmp9	matrix metallopeptidase 9	5.1102	3.32974	3.95287
Mrc1	mannose receptor, C type 1			12.3593
Ms4a2	membrane-spanning 4-domains, subfamily A, member 2			-3.87122
Ms4a4a	membrane-spanning 4-domains, subfamily A, member 4A	8.51833		8.51833
Ms4a7	membrane-spanning 4-domains, subfamily A, member 7	7.55426	3.97031	7.55426
Mx1	MX dynamin-like GTPase 1			10.6538
Myc	myelocytomatosis oncogene		1.73516
Myd88	myeloid differentiation primary response gene 88	4.20178		4.16952
Nae1	NEDD8 activating enzyme E1 subunit 1	-2.14286
Ncf1	neutrophil cytosolic factor 1		4.58573	5.73332
Ncf2	neutrophil cytosolic factor 2		3.40423	6.12105
Ncf4	neutrophil cytosolic factor 4	4.0695		6.5965
Nfat5	nuclear factor of activated T cells 5	-1.55674
Nfatc3	nuclear factor of activated T cells	-2.65501	-2.11415
Nfe2l2	nuclear factor, erythroid derived 2, like 2			2.36217
Neo1	neogenin			-3.39335
Nfkb2	nuclear factor of kappa light polypeptide gene enhancer		2.74554	3.75536
Nfkbia	nuclear factor of kappa light polypeptide gene enhancer		2.37952
Nlrc4	NLR family, CARD domain containing 4		2.13462
Nlrp3	NLR family, pyrin domain containing 3		14.6826	11.5722
Ngly1	N-glycanase 1	-1.95802
Nkg7	natural killer cell group 7 sequence	-2.39394		-2.06897
Nlrp3	NLR family, pyrin domain containing 3	44.9074		11.5722
Nod1	nucleotide-binding oligomerization domain containing 1	1.78439
Nod2	nucleotide-binding oligomerization domain containing 2			4.95001
Notch1	notch 1			-2.55425
Nt5e	5' nucleotidase, ecto	-2.92021
Ntng2	netrin G2	1.87811
Oas1a	2'-5' oligoadenylate synthetase 1A			25.6278
Oas2	2'-5' oligoadenylate synthetase 2	6.94223		8.25335
Os9	amplified in osteosarcoma	-1.57047
Osm	oncostatin M	23.4048	45.8335	42.6
Pdcd1lg2	programmed cell death 1 ligand 2		5.42668	15.5454
Pdhb	pyruvate dehydrogenase (lipoamide) beta		-2.03046
Peli1	pellino 1	-3.02977		-2.88542
Peli2	pellino 2			-2.88542
Pfkfb3	6-phosphofructo-2-kinase/fructose-2,6-biphosphatase 3			2.16072
Pik3ap1	phosphoinositide-3-kinase adaptor protein 1	3.78213		3.60293
Pik3ca	phosphatidylinositol 3-kinase, catalytic, alpha polypeptide	-2.4977
Pik3cb	phosphatidylinositol 3-kinase, catalytic, beta polypeptide			-2.00903
Pik3cd	phosphatidylinositol 3-kinase catalytic delta polypeptide		3.57006	6.16312
Pik3r6	phosphoinositide-3-kinase, regulatory subunit 6	2.16323		2.02355
Pirb	paired Ig-like receptor B	3.98166		6.27115
Plau	plasminogen activator, urokinase			4.37247
Plaur	plasminogen activator, urokinase receptor	9.23838	5.0198	8.14814
Plcg1	phospholipase C, gamma 1			-2.18378
Plcg2	phospholipase C, gamma 2			2.02188
Plek	pleckstrin	5.10698	3.89999	5.58478
Plekha1	pleckstrin homology domain containing, family A	-1.62792
Plin4	perilipin 4		-2.8735
Plscr1	phospholipid scramblase 1		3.37737	5.33334
Prf1	perforin 1 (pore forming protein)	-2.23077		-2.0138
Prcp	prolylcarboxypeptidase (angiotensinase C)			2.22785
Prdm1	PR domain containing 1, with ZNF domain			-2.26238
Psap	prosaposin	-2.25771
Psen1	presenilin 1	-1.5068
Psmb10	proteasome (prosome, macropain) subunit, beta type 10	3.15218		2.47488
Psmb8	proteasome (prosome, macropain) subunit, beta type 8			2.21043
Psmb9	proteasome (prosome, macropain) subunit, beta type 9			2.38608
Pstpip1	proline-serine-threonine phosphatase-interacting protein 1	3.05847		2.96023
Ptgs2	prostaglandin-endoperoxide synthase 2	34.0516	17.0202	8.80938
Ptger4	prostaglandin E receptor 4 (subtype EP4)			2.15834
Ptk2b	PTK2 protein tyrosine kinase 2 beta	1.50862
Ptpn4	protein tyrosine phosphatase, non-receptor type 4		-1.54553	-2.01794
Ptpn6	protein tyrosine phosphatase, non-receptor type 6	2.00878
Ptprc	protein tyrosine phosphatase, receptor type, C	3.07972		3.84004
Pxn	paxillin	2.91125	1.91459
Pycard	PYD and CARD domain containing	1.58337
Rac2	RAS-related C3 botulinum substrate 2	5.45962	3.71278	4.67462
Raf1	v-raf-leukemia viral oncogene 1	-1.96516
Rasgrp1	RAS guanyl releasing protein 1	-1.95833		-1.75758
Rasgrp4	RAS guanyl releasing protein 4	4.17487	2.805	4.06763
Rb1cc1	RB1-inducible coiled-coil 1	-3.87211		-2.88058
Rhog	ras homolog gene family, member G	2.43075		2.14432
Ripk2	receptor (TNFRSF)-interacting serine-threonine kinase 2	-2.27526	-1.75908
Ripk3	receptor-interacting serine-threonine kinase 3	4.70733		9.61902
Rnf31	ring finger protein 31	1.67356
Rnasel	ribonuclease L (2', 5'-oligoisoadenylate synthetase-dependent		2.84666	4.10246
Rorc	RAR-related orphan receptor gamma	-3.00359	-2.68894	-4.33445
Rsad2	radical S-adenosyl methionine domain containing 2	7.54866		4.59091
Runx3	runt related transcription factor 3		7.86207	11.2561
S100a1	S100 calcium binding protein A1	246.45	77.9339	295.932
Samhd1	SAM domain and HD domain, 1	2.76824		2.97644
Scarb2	scavenger receptor class B, member 2	-2.09731	-1.8521
Sell	selectin, lymphocyte	32.3694		57.1701
Serpina1a	serine (or cysteine) peptidase inhibitor, clade A, member 1		3.36764
Sirpa	signal-regulatory protein alpha	2.24857		2.78514
Sigirr	single immunoglobulin and toll-interleukin 1 receptot			-3.29583
Slc11a1	solute carrier family 11 member 1	7.16666
Smad4	SMAD family member 4	-2.21537
Socs3	suppressor of cytokine signaling 3	5.96028	6.69512	10.4378
Sod1	superoxide dismutase 1, soluble		-2.3575	-2.1396
Sort1	sortilin 1			-2.00959
Sp100	nuclear antigen Sp100	2.90361		2.44284
Sp140	Sp140 nuclear body protein		2.12697
Spi1	spleen focus forming virus (SFFV) proviral integration oncogene			3.9071
Stat1	signal transducer and activator of transcription 1	2.40506		2.63719
Stat2	signal transducer and activator of transcription 2			2.6089
Stat3	signal transducer and activator of transcription 3	1.95976	1.76766	2.04054
Stat5a	signal transducer and activator of transcription 5A		2.39431	3.16308
Syk	spleen tyrosine kinase		3.81798	7.11483
Tap2	transporter 2, ATP-binding cassette, sub-family B		2.32726
Tbxas1	thromboxane A synthase 1, platelet		2.11111	2.82001
Tcf7	transcription factor 7, T cell specific			-2.04845
Tcirg1	T cell, immune regulator 1, ATPase, H+ transporting V0 subunit A3	2.17611		2.32088
Tcn2	transcobalamin 2		2.14399	2.46528
Tgfb1	transforming growth factor, beta 1			2.23495
Tgfb2	transforming growth factor, beta 2	-3.29688	-2.79053	-3.00568
Tgfb3	transforming growth factor, beta 3			-2.55101
Thbs1	thrombospondin 1	2.78535
Timp2	tissue inhibitor of metalloproteinase 2			-2.11229
Ticam1	toll-like receptor adaptor molecule 1		1.50968
Tirap	toll-interleukin 1 receptor (TIR) domain-containing adapter protein			3.48781
Tlr1	toll-like receptor 1			7.08732
Tlr4	toll-like receptor 4			2.45078
Tlr6	toll-like receptor 6	4.40164	2.83703	3.83333
Tlr8	toll-like receptor 8			7.89533
Tmem140	transmembrane protein 140		2.21333
Tmem173	transmembrane protein 173			6.70957
Tnf	tumor necrosis factor	5.6947
Tnfrsf1a	tumor necrosis factor receptor superfamily, member 1a	2.11304	1.84459	2.23222
Tnfrsf18	tumor necrosis factor receptor superfamily, member 18			2.63193
Tnfrsf25	tumor necrosis factor receptor superfamily, member 25		1.56
Tnfrsf9	tumor necrosis factor receptor superfamily, member 9			4.79556
Tnfsf9	tumor necrosis factor (ligand) superfamily, member 9		3.64814	3.56818
Tollip	toll interacting protein	-1.56057
Traf6	TNF receptor-associated factor 6		-1.66167
Trat1	T cell receptor associated transmembrane adaptor 1	-3.89999		-3.35713
Trim25	tripartite motif-containing 25	1.87957
Trim33	tripartite motif-containing 33		-3.24444
Trim5	tripartite motif-containing 5			2.05435
Txnip	thioredoxin interacting protein		-2.04086	-2.40474
Tyk2	tyrosine kinase 2		2.11904
Tyrobp	TYRO protein tyrosine kinase binding protein	4.67553	6.53239	8.14311
Ube2n	ubiquitin-conjugating enzyme E2N	-1.58046
Ulk2	unc-51 like kinase 2		-2.7379
Vamp3	vesicle-associated membrane protein 3		1.53964	1.76682
Vcam1	vascular cell adhesion molecule 1			3.06061
Vegfa	vascular endothelial growth factor A			3.3693
Vrk3	vaccinia related kinase 3			2.38462
Vimp	VCP-interacting membrane protein		-1.94145
Vwf	Von Willebrand factor homolog	-2.10801
Was	Wiskott-Aldrich syndrome homolog (human)	2.60312		2.92422
Xaf1	XIAP associated factor 1	2.74189		2.81579
Xbp1	X-box binding protein 1			1.70584
Ybx3	Y box protein 3	-2.21445	-2.56306
Zbp1	Z-DNA binding protein 1			26.9259
